# Supplementary material for: Room temperature synthesis of poly(poly(ethylene glycol) methyl ether methacrylate)-based diblock copolymer nano-objects via Photoinitiated Polymerization-Induced Self-Assembly (Photo-PISA)
Source: Royal Society of Chemistry journal article supplement (doi:10.1039/c6py00022c), 2016-01-01
Supplement: c6py00022c1.pdf [file c6py00022c1.pdf]

# **Room Temperature Synthesis of Poly(poly(ethylene glycol) methyl ether methacrylate)-based Diblock Copolymer Nano-objects via Photoinitiated Polymerization-Induced Self-Assembly (Photo-PISA)**

Jianbo Tan<sup>\*a,b</sup>, Yuhao Bai<sup>a</sup>, Xuechao Zhang<sup>a</sup>, Li Zhang<sup>\*a,b</sup>

*a. Department of Polymeric Materials and Engineering, School of Materials and Energy, Guangdong University of Technology, Guangzhou 510006, China.*

*b. Guangdong Provincial Key Laboratory of Functional Soft Condensed Matter*

\*Corresponding authors: [tanjianbo@gdut.edu.cn](mailto:tanjianbo@gdut.edu.cn), [lizhang@gdut.edu.cn](mailto:lizhang@gdut.edu.cn)

## ADDITIONAL RESULTS

**Bioconjugation with Proteins.** In this paper, 4-cyano-4-(dodecylsulfanylthiocarbonyl)sulfanylpentanoic acid was used as the RAFT agent. As a result, a certain amount of carboxyl groups were introduced to the surface of vesicles prepared by photo-PISA, which can be used for bioconjugation.

An aliquot of PPEGMA<sub>14</sub>-PHPMA<sub>400</sub> prepared at 15% w/w was washed twice with 500  $\mu$ L of MES buffer (pH 5.5, 100 mM), and the sample was redispersed in 400  $\mu$ L of MES buffer. A solution of EDC and NHS in MES buffer (100  $\mu$ L, containing 8 mg of EDC and 22 mg of NHS) was added with gentle vortexing for 30 min, then the sample was sedimented by centrifugation and washed twice with 500  $\mu$ L PBS buffer, and finally dispersed in 500  $\mu$ L PBS buffer. Then a fluorescein-labeled BSA solution (100  $\mu$ L, 2 mg/mL)<sup>1</sup> was added to the centrifuge tube, and incubated with gentle vortexing for 3 h. The sample was washed three times with PBS buffer.

As a control experiment, we also carried out the bioconjugation protocol as described above without EDC activation.

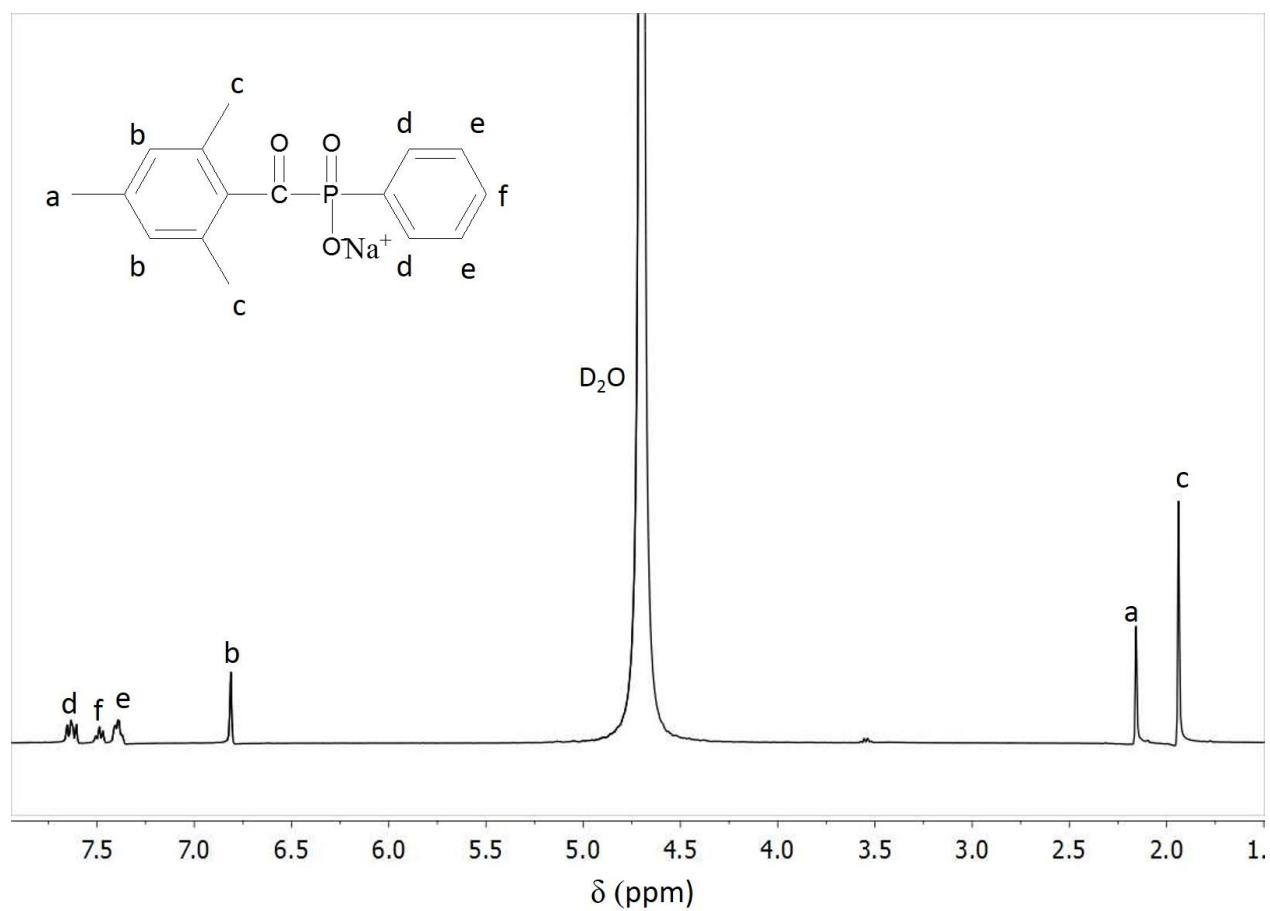

Figure S1.  $^1\text{H}$  NMR spectrum of sodium phenyl-2,4,6-trimethylbenzoylphosphinate (SPTP) in  $\text{D}_2\text{O}$  at  $25^\circ\text{C}$ .

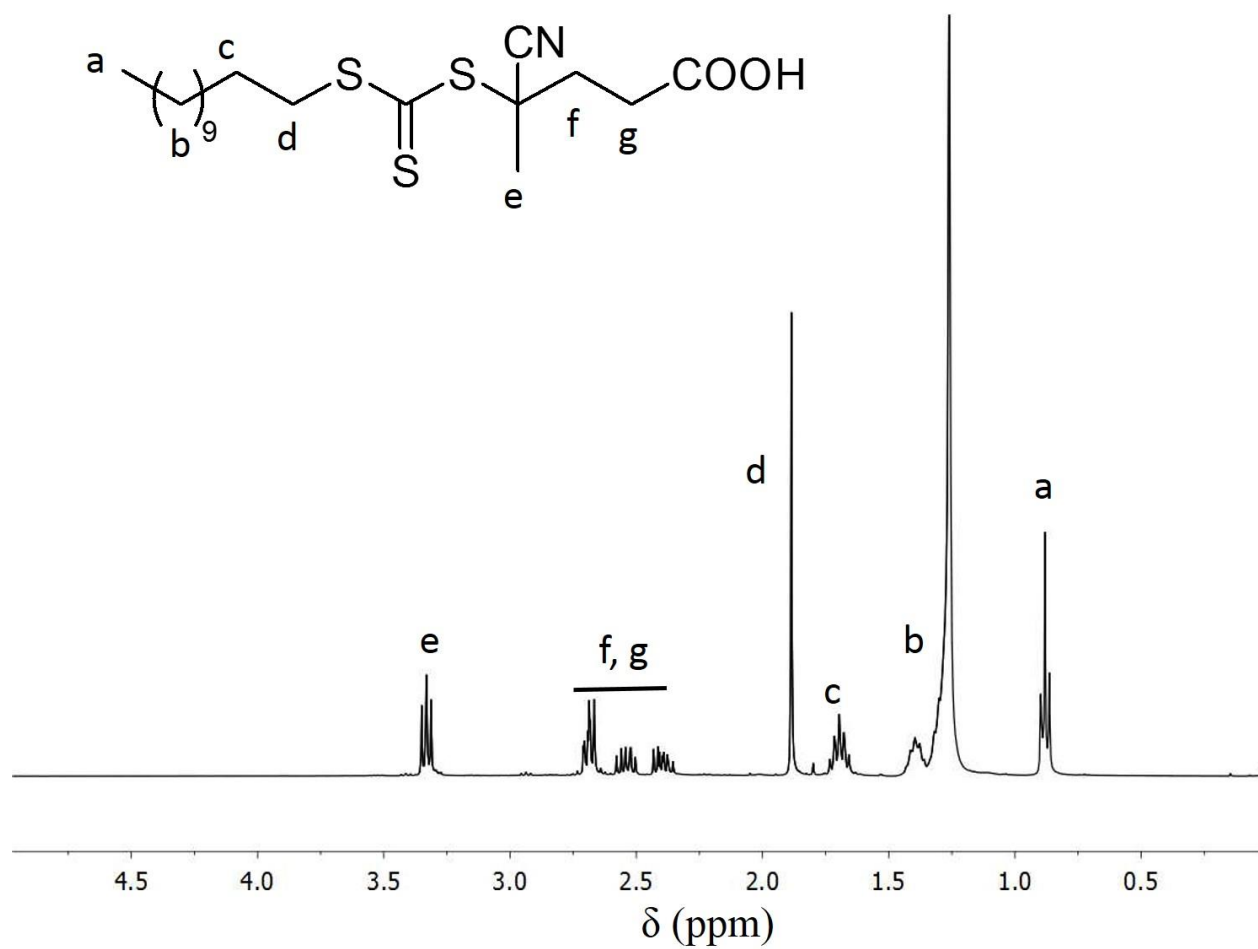

Figure S2.  $^1\text{H}$  NMR spectrum of 4-cyano-4-(dodecylsulfanylthiocarbonyl) sulfanylpentanoic acid (CDPA) in  $\text{CDCl}_3$  at  $25^\circ\text{C}$ .

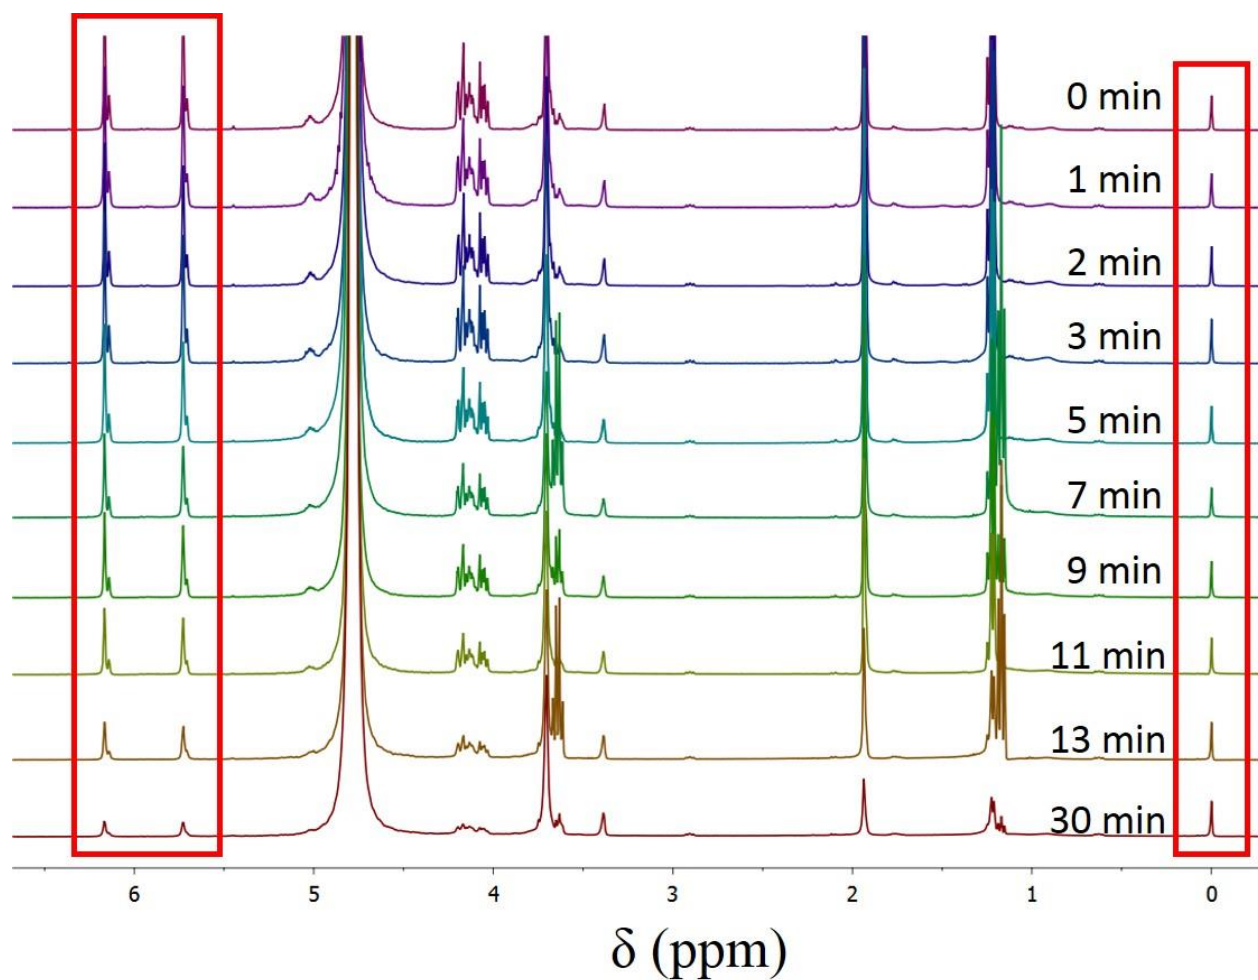

Figure S3.  $^1\text{H}$  NMR spectra of the dispersions prepared via aqueous photo-PISA of HPMA at predetermined times using a PPEGMA<sub>14</sub> macro-RAFT agent, and the targeted DP of PHPMA was 200. The  $^1\text{H}$  NMR spectra were measured in  $\text{D}_2\text{O}$  at 25  $^\circ\text{C}$ .

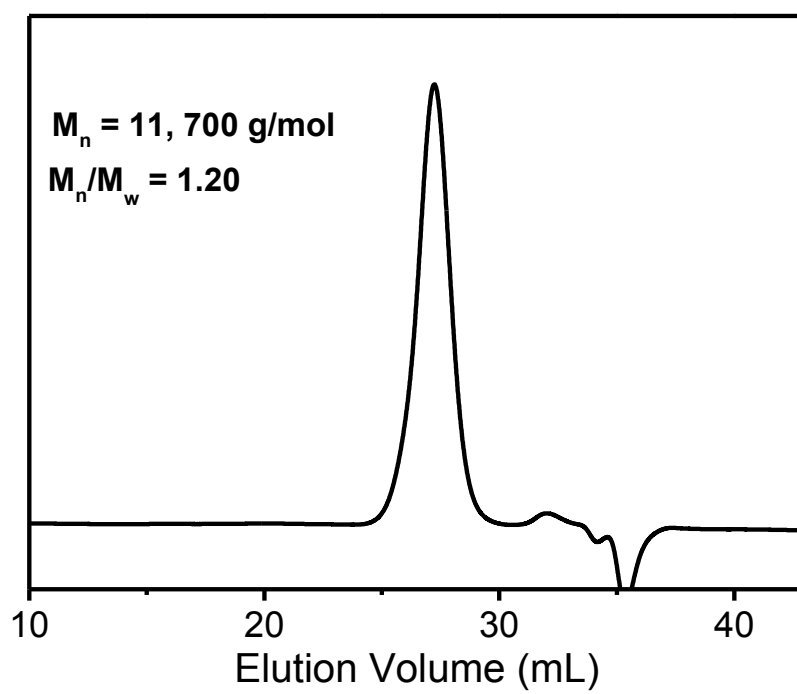

Figure S4. THF gel permeation chromatography (GPC) (vs. poly(methyl methacrylate) standards) obtained for PPEGMA<sub>25</sub>-CDPA.

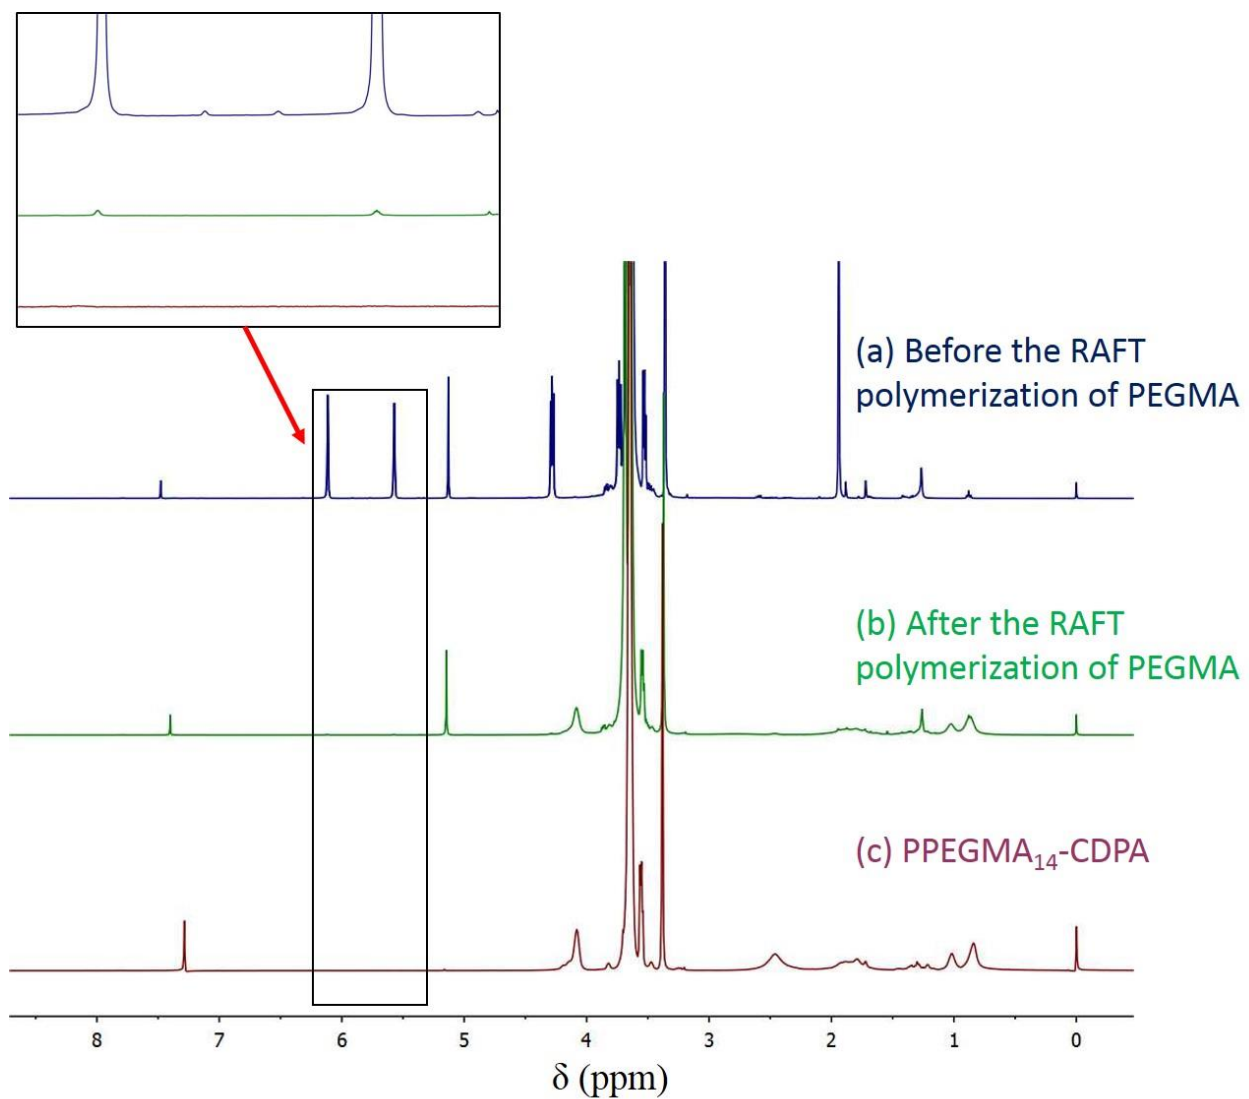

Figure S5. (a)  $^1\text{H}$  NMR spectrum of the sample obtained before the RAFT solution polymerization of PEGMA; (b)  $^1\text{H}$  NMR spectrum of the sample obtained after the RAFT solution polymerization; (c)  $^1\text{H}$  NMR spectrum of PPEGMA<sub>14</sub>-CDPA after several washes with diethyl ether. No vinyl signal was observed from the  $^1\text{H}$  NMR spectrum of PPEGMA<sub>14</sub>-CDPA, which indicates all the unreacted monomers have been removed.

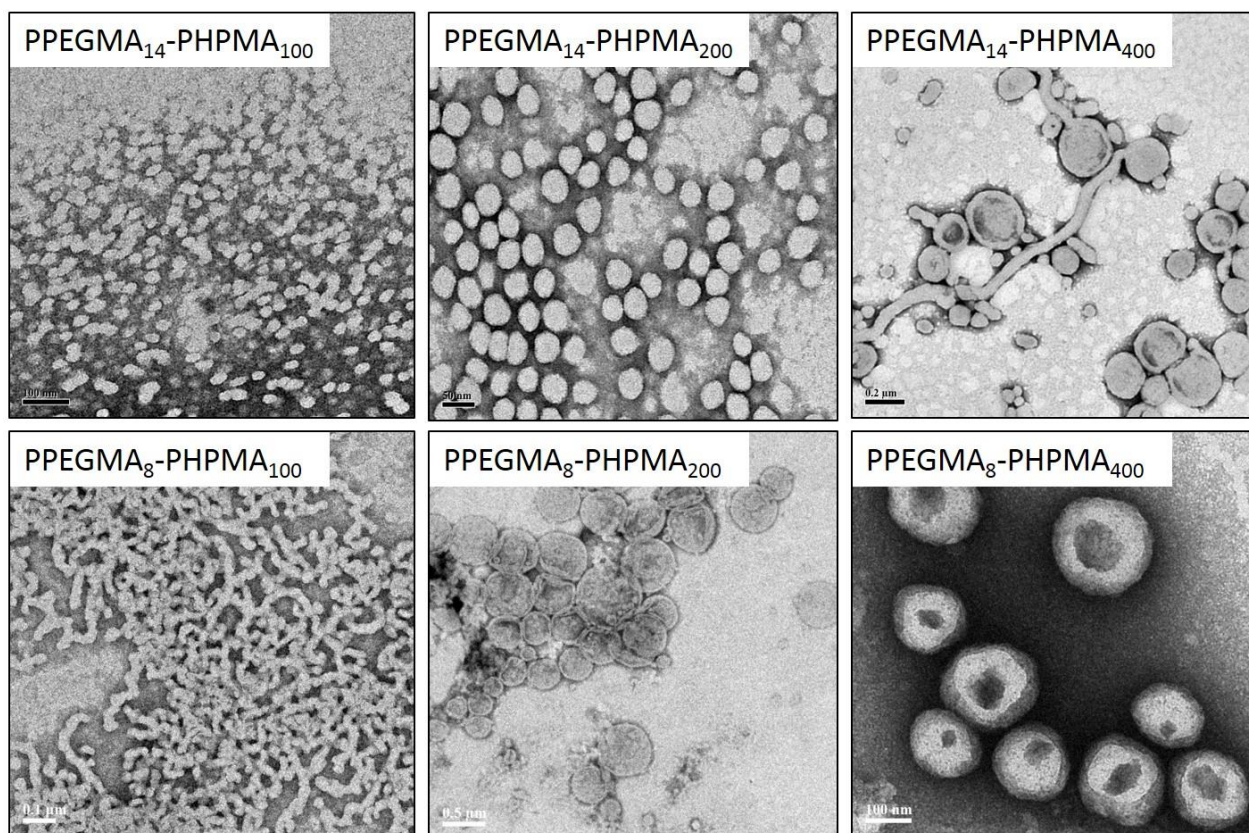

Figure S6. TEM images of PPEGMA<sub>14</sub>-HPMA<sub>χ</sub> and PPEGMA<sub>8</sub>-HPMA<sub>χ</sub> ( $\chi = 100, 200, 400$ ) prepared by photo-PISA of HPMA at 10% w/w concentration.

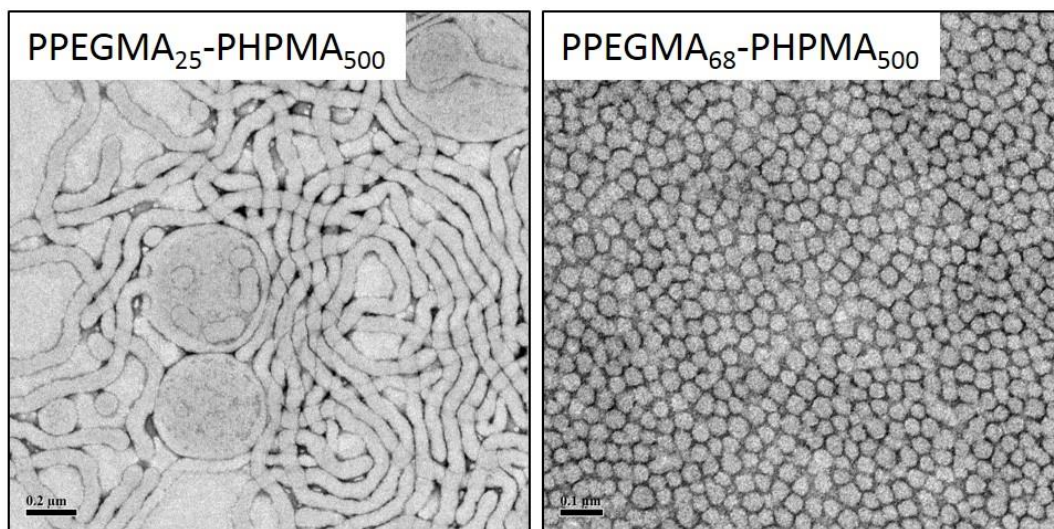

Figure S7. TEM images of PPEGMA<sub>25</sub>-HPMA<sub>500</sub> and PPEGMA<sub>68</sub>-HPMA<sub>500</sub> nanoparticles prepared by photo-PISA of HPMA at 20% w/w concentration.



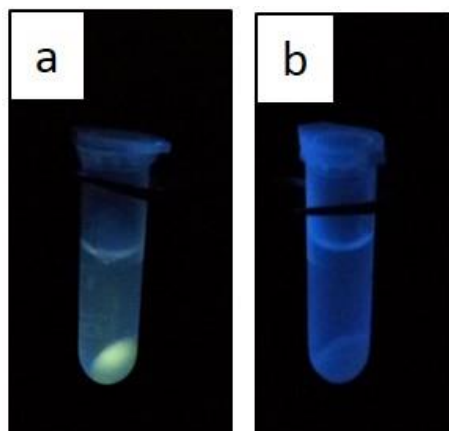

Figure S8. (a) Centrifuge tube containing sedimented PEGMA<sub>14</sub>-PPMA<sub>400</sub> vesicles (prepared at 15% w/w), activated with EDC and NHS, and treated with fluorescein-labeled BSA; (b) Centrifuge tube containing sedimented PEGMA<sub>14</sub>-PPMA<sub>400</sub> vesicles (prepared at 15% w/w), without EDC activation, and treated with fluorescein-labeled BSA. Both centrifuge tubes were exposed to 365 nm light.

#### ***REFERENCE***

- (1) Tan, J.; Sun, H.; Yu, M.; Sumerlin, B. S.; Zhang, L. *ACS Macro Lett.* **2015**, 4 (11), 1249.
